# Supplementary material
Source: publisher figshare collection journal article supplement (https://acs.figshare.com/ndownloader/files/4181239)
Supplement: Supplementary file 1 [file 4181239]

data_tis2en\w\H\est
_audit_creation_date              2011-12-15
_audit_creation_method            'Materials Studio'
_symmetry_space_group_name_H-M    'R-3C'
_symmetry_Int_Tables_number       167
_symmetry_cell_setting            trigonal
loop_
_symmetry_equiv_pos_as_xyz
  x,y,z
  z,x,y
  y,z,x
  -y+1/2,-x+1/2,-z+1/2
  -x+1/2,-z+1/2,-y+1/2
  -z+1/2,-y+1/2,-x+1/2
  -x,-y,-z
  -z,-x,-y
  -y,-z,-x
  y+1/2,x+1/2,z+1/2
  x+1/2,z+1/2,y+1/2
  z+1/2,y+1/2,x+1/2
_cell_length_a                    11.1481
_cell_length_b                    11.1481
_cell_length_c                    11.1481
_cell_angle_alpha                 113.0160
_cell_angle_beta                  113.0160
_cell_angle_gamma                 113.0160
loop_
_atom_site_label
_atom_site_type_symbol
_atom_site_fract_x
_atom_site_fract_y
_atom_site_fract_z
_atom_site_U_iso_or_equiv
_atom_site_adp_type
_atom_site_occupancy
C      C     0.34219   0.45736   0.19611   0.00000  Uiso   1.00
H1     H     0.40785   0.42144   0.25797   0.00000  Uiso   1.00
H2     H     1.05257   0.84886  -0.21147   0.00000  Uiso   1.00
H3N    H     1.53303   0.65862   0.23983   0.00000  Uiso   1.00
H4N    H     1.45311   0.46664   0.08400   0.00000  Uiso   1.00
N      N     0.42123   0.53340   0.13971   0.00000  Uiso   1.00
S1     S     0.80606  -0.30606   0.25000   0.00000  Uiso   1.00
S2     S     0.98774  -0.48774   0.25000   0.00000  Uiso   1.00
Ti     Ti    0.54305  -0.04305   0.25000   0.00000  Uiso   1.00
